# Supplementary material for: CircDLST promotes the tumorigenesis and metastasis of gastric cancer by sponging miR-502-5p and activating the NRAS/MEK1/ERK1/2 signaling
Source: PubMed Central journal article supplement (PMC6449953; doi:10.1186/s12943-019-1015-1), 2019-04-05

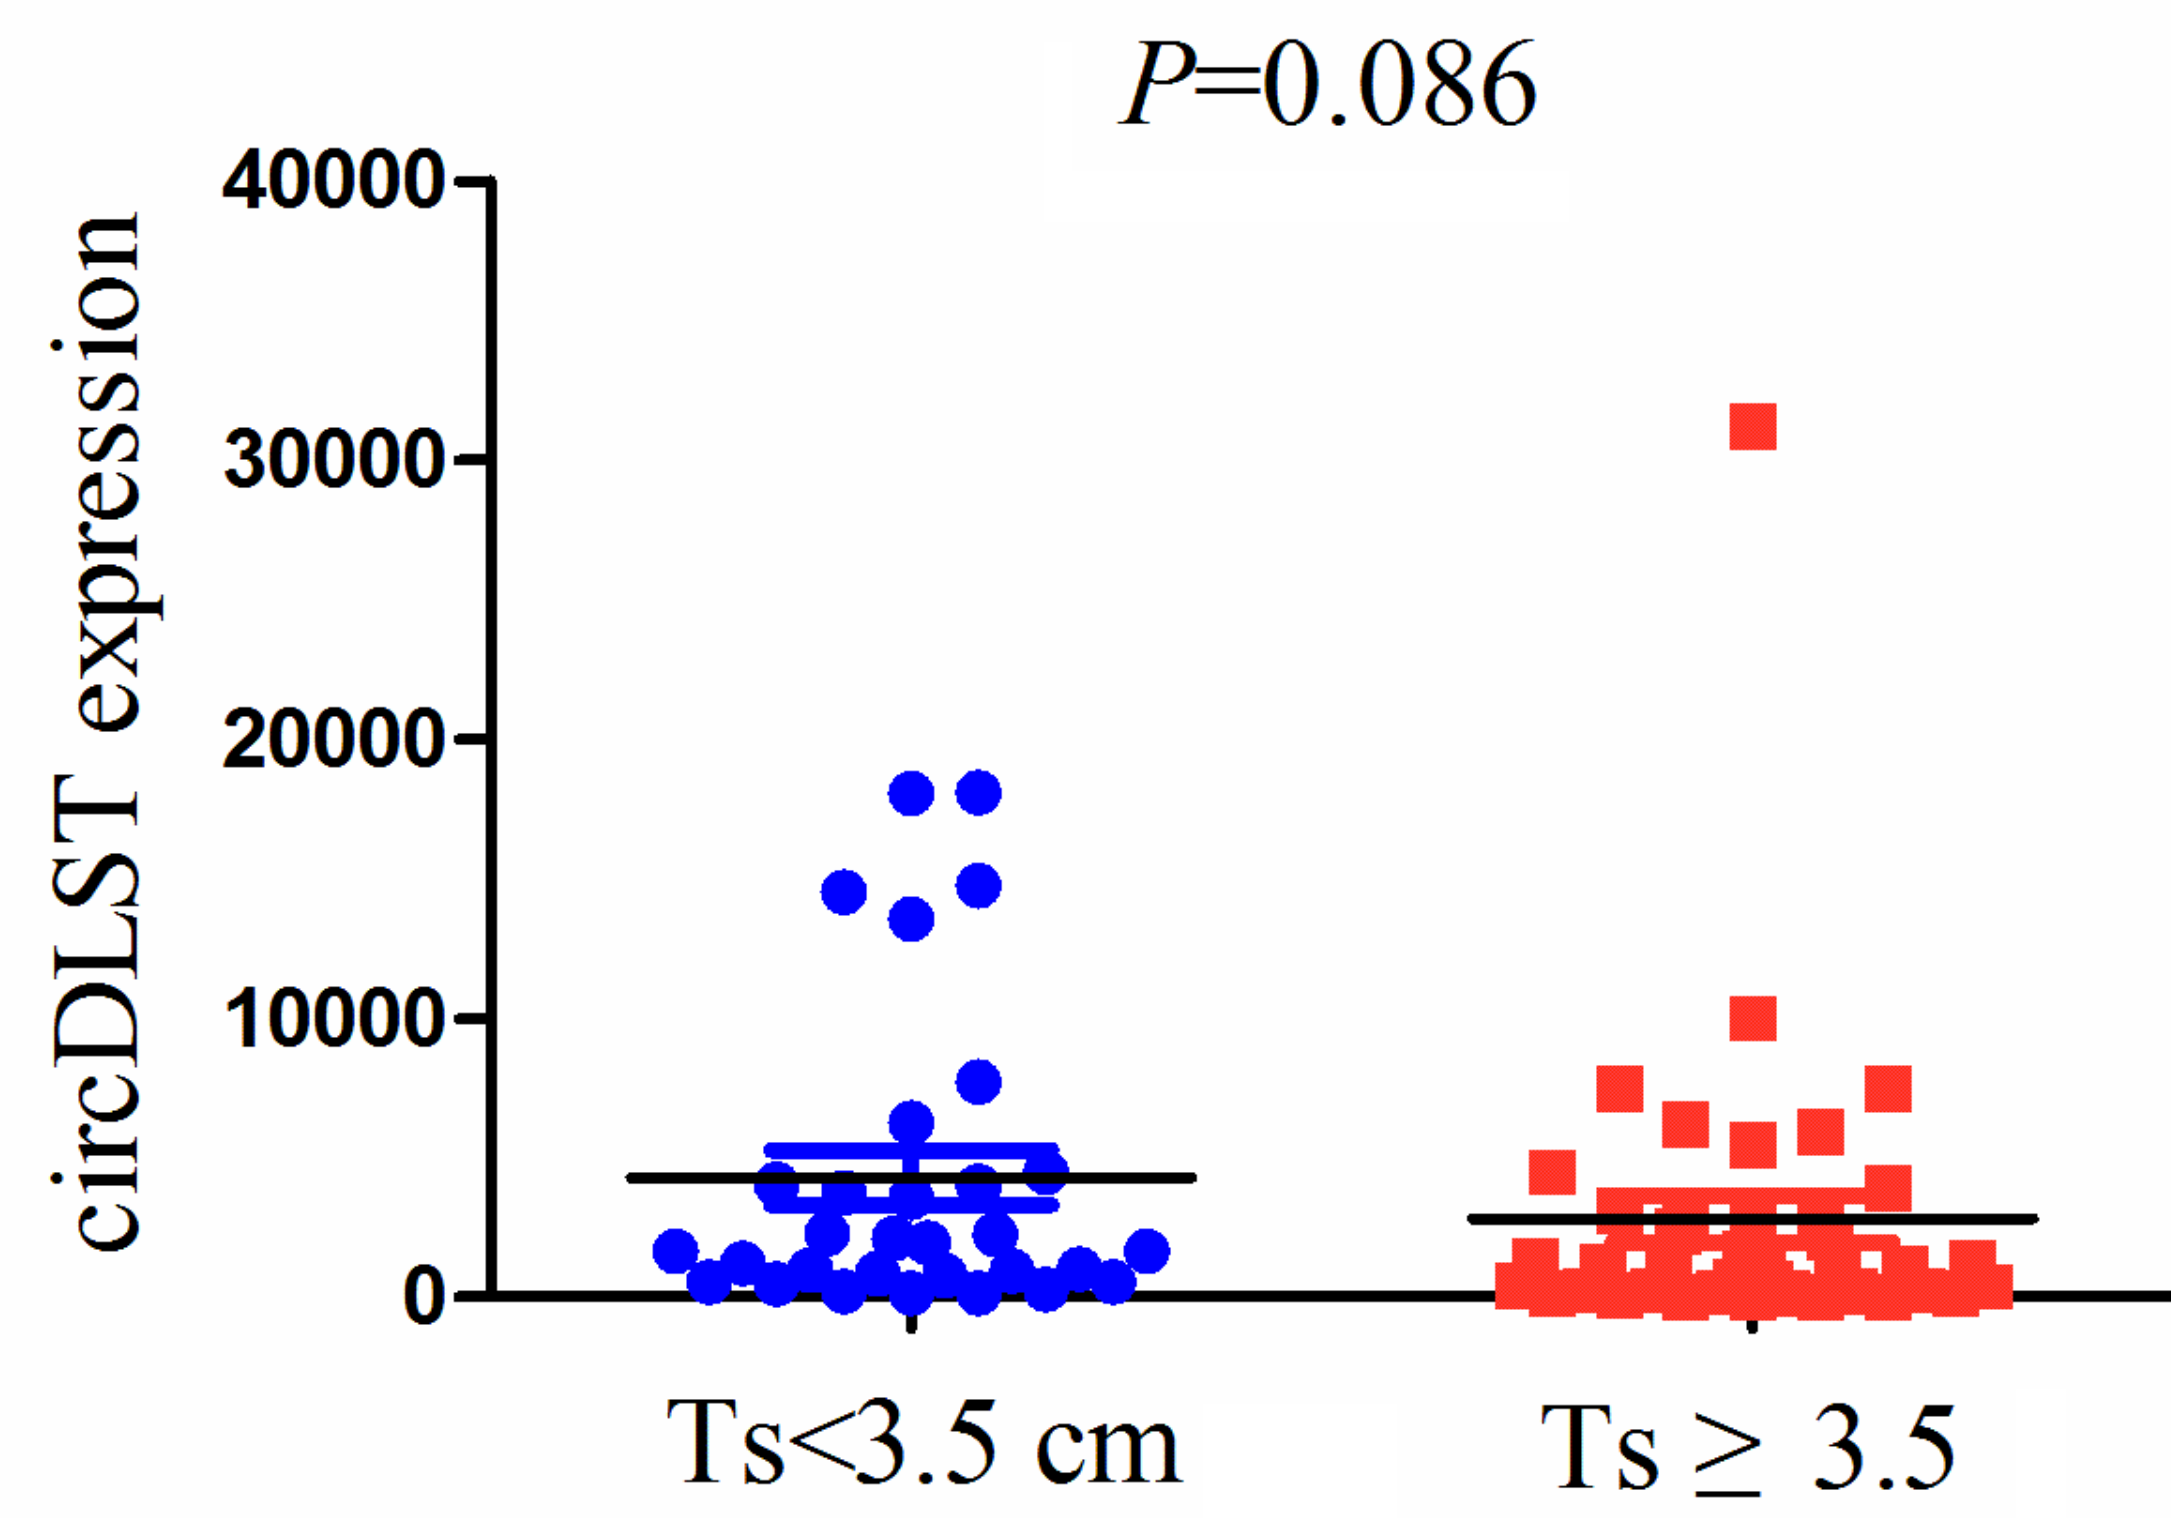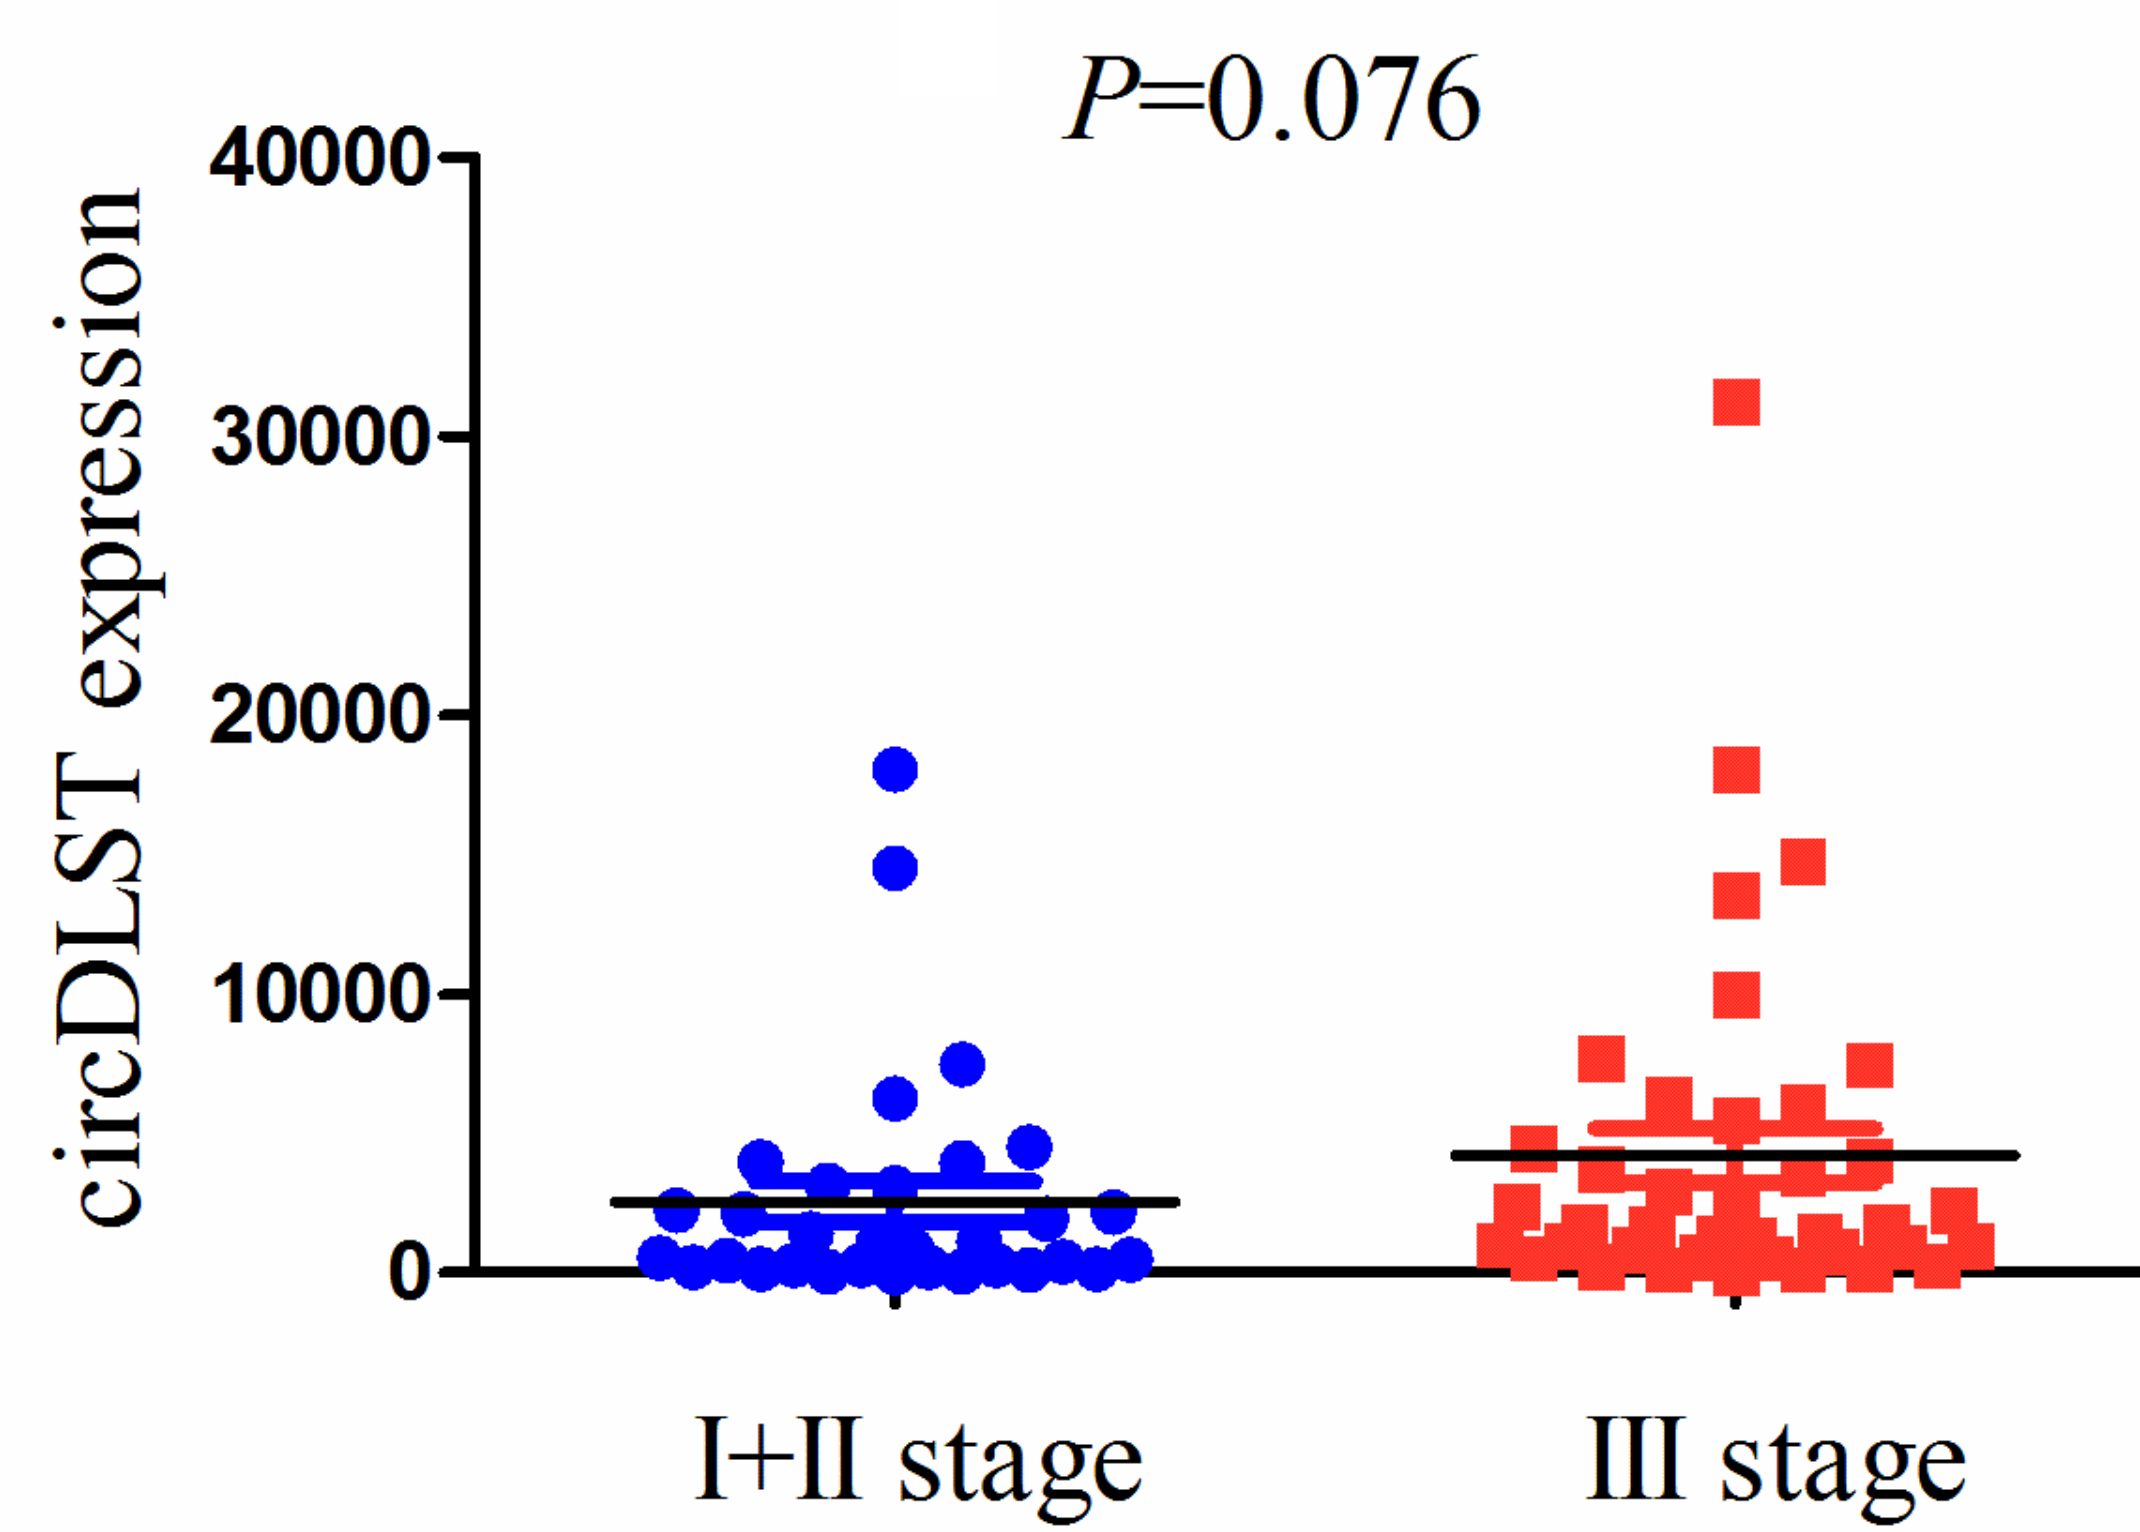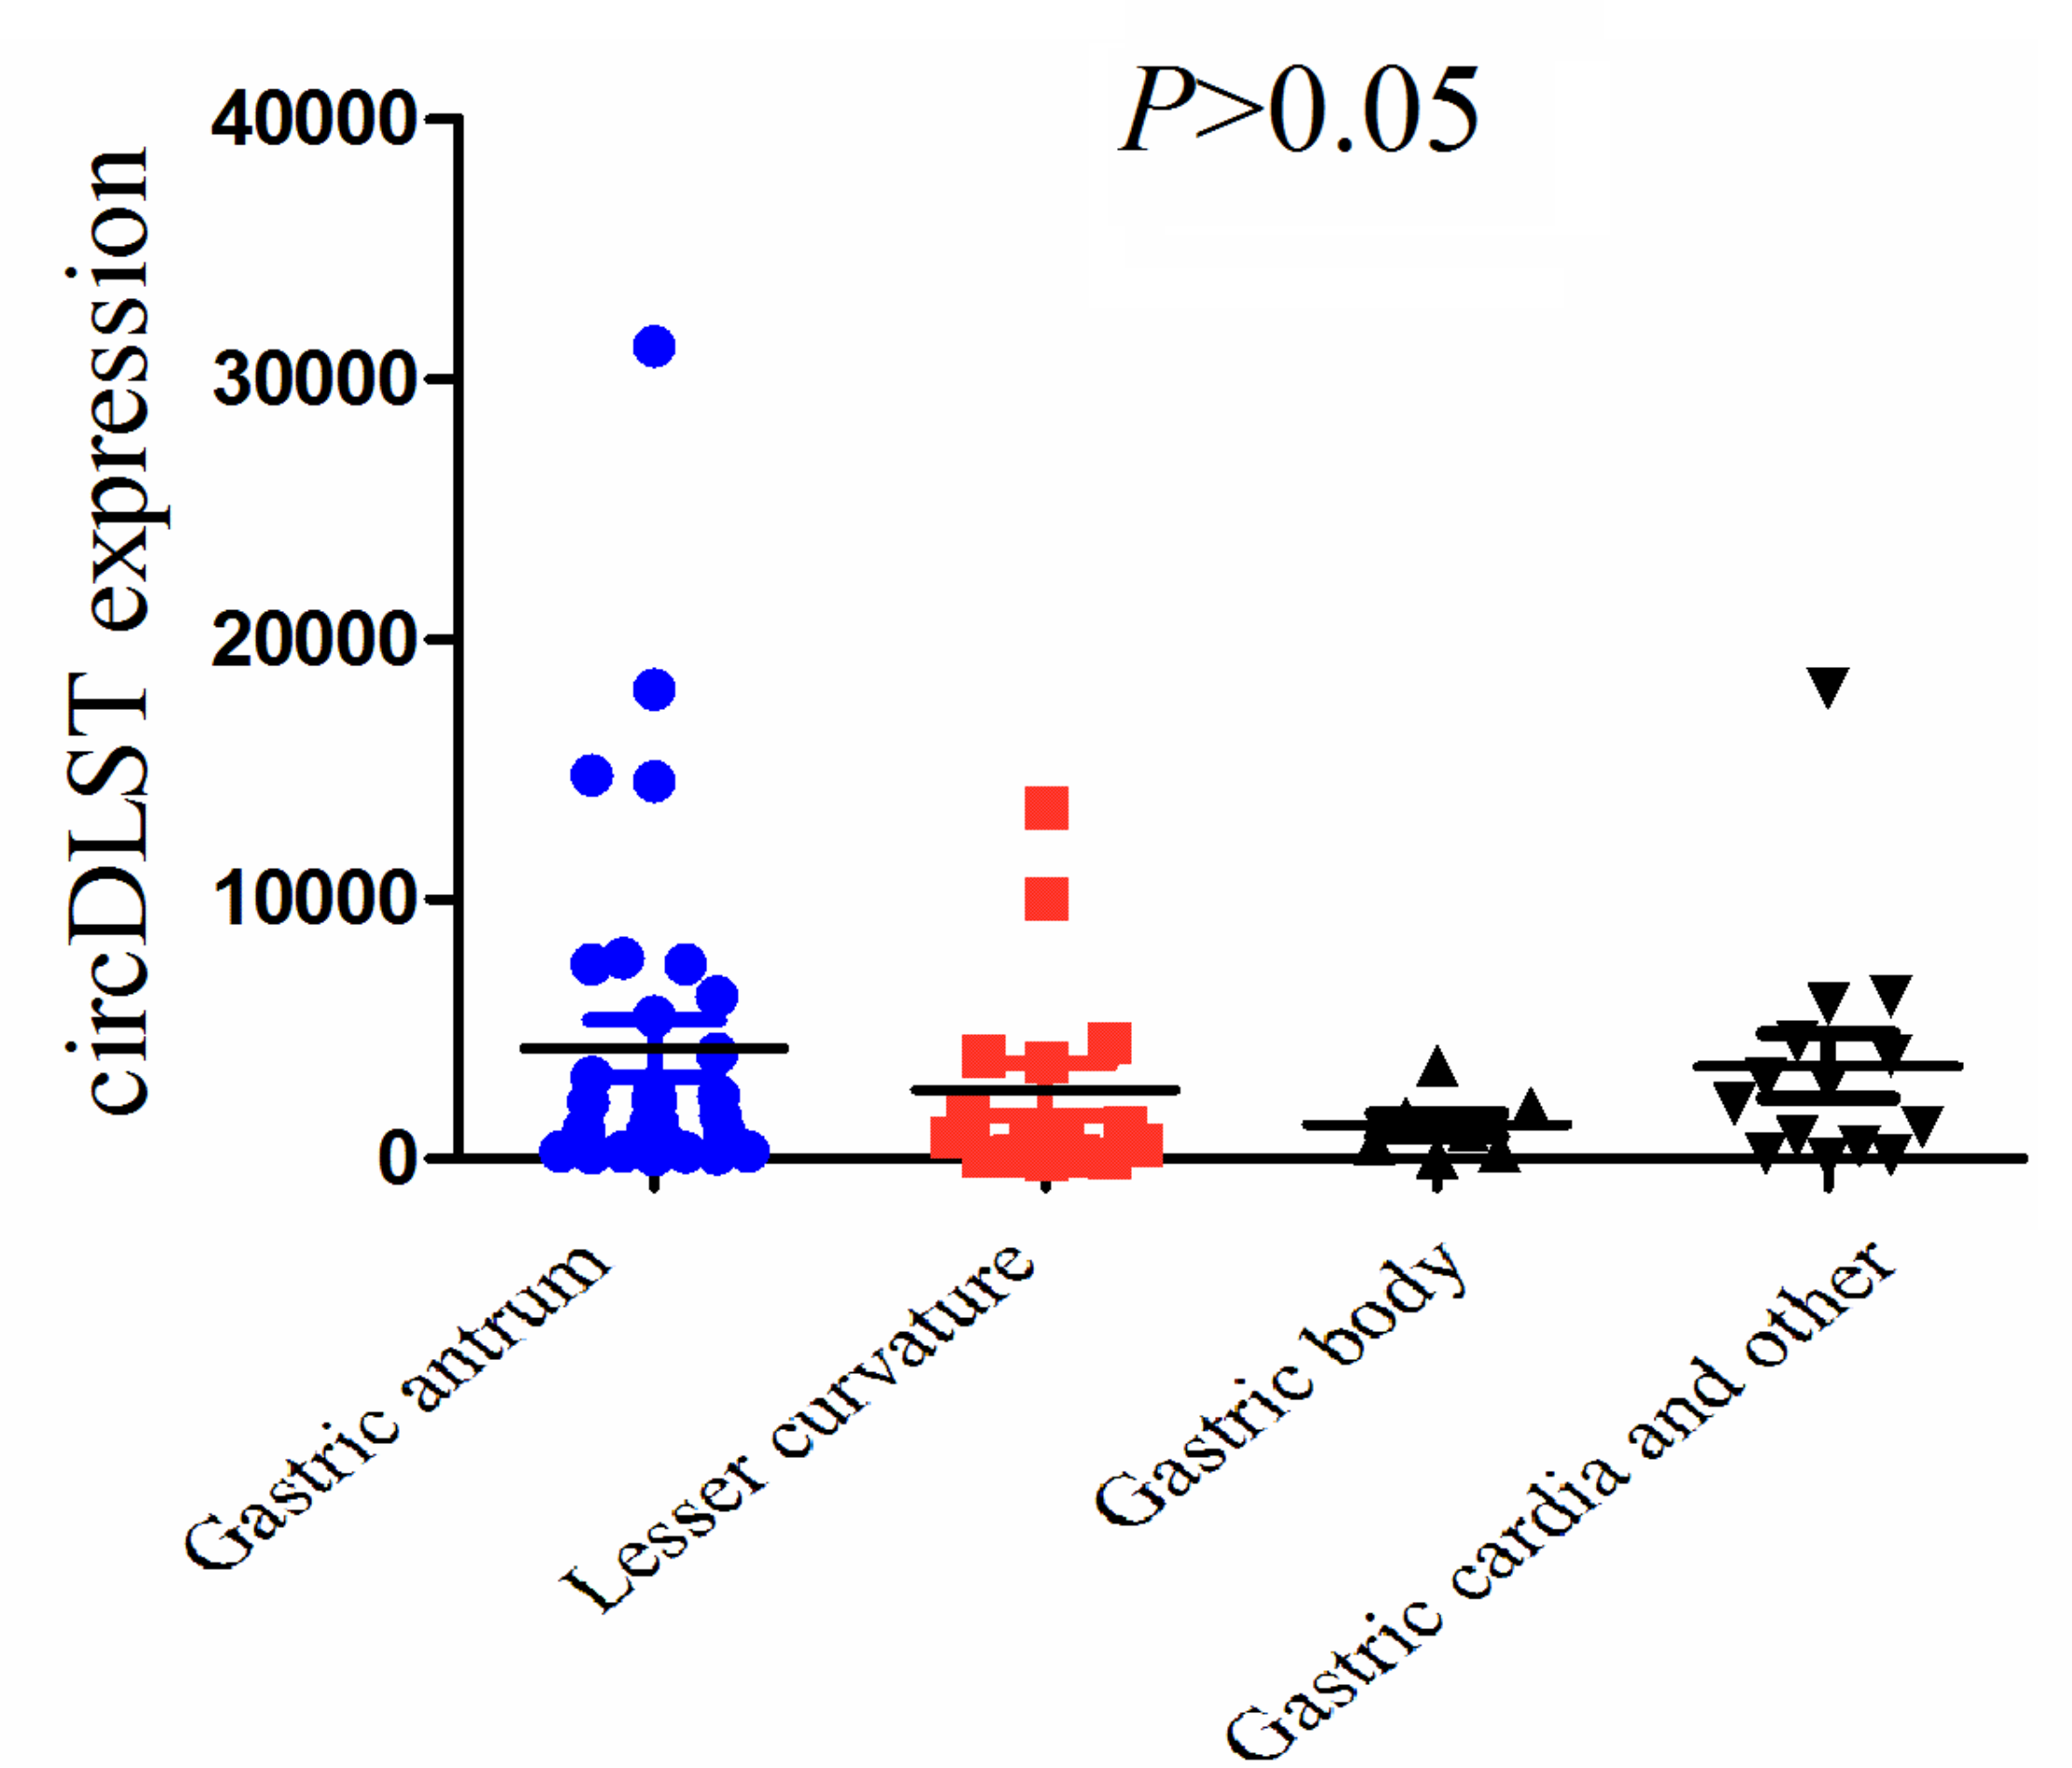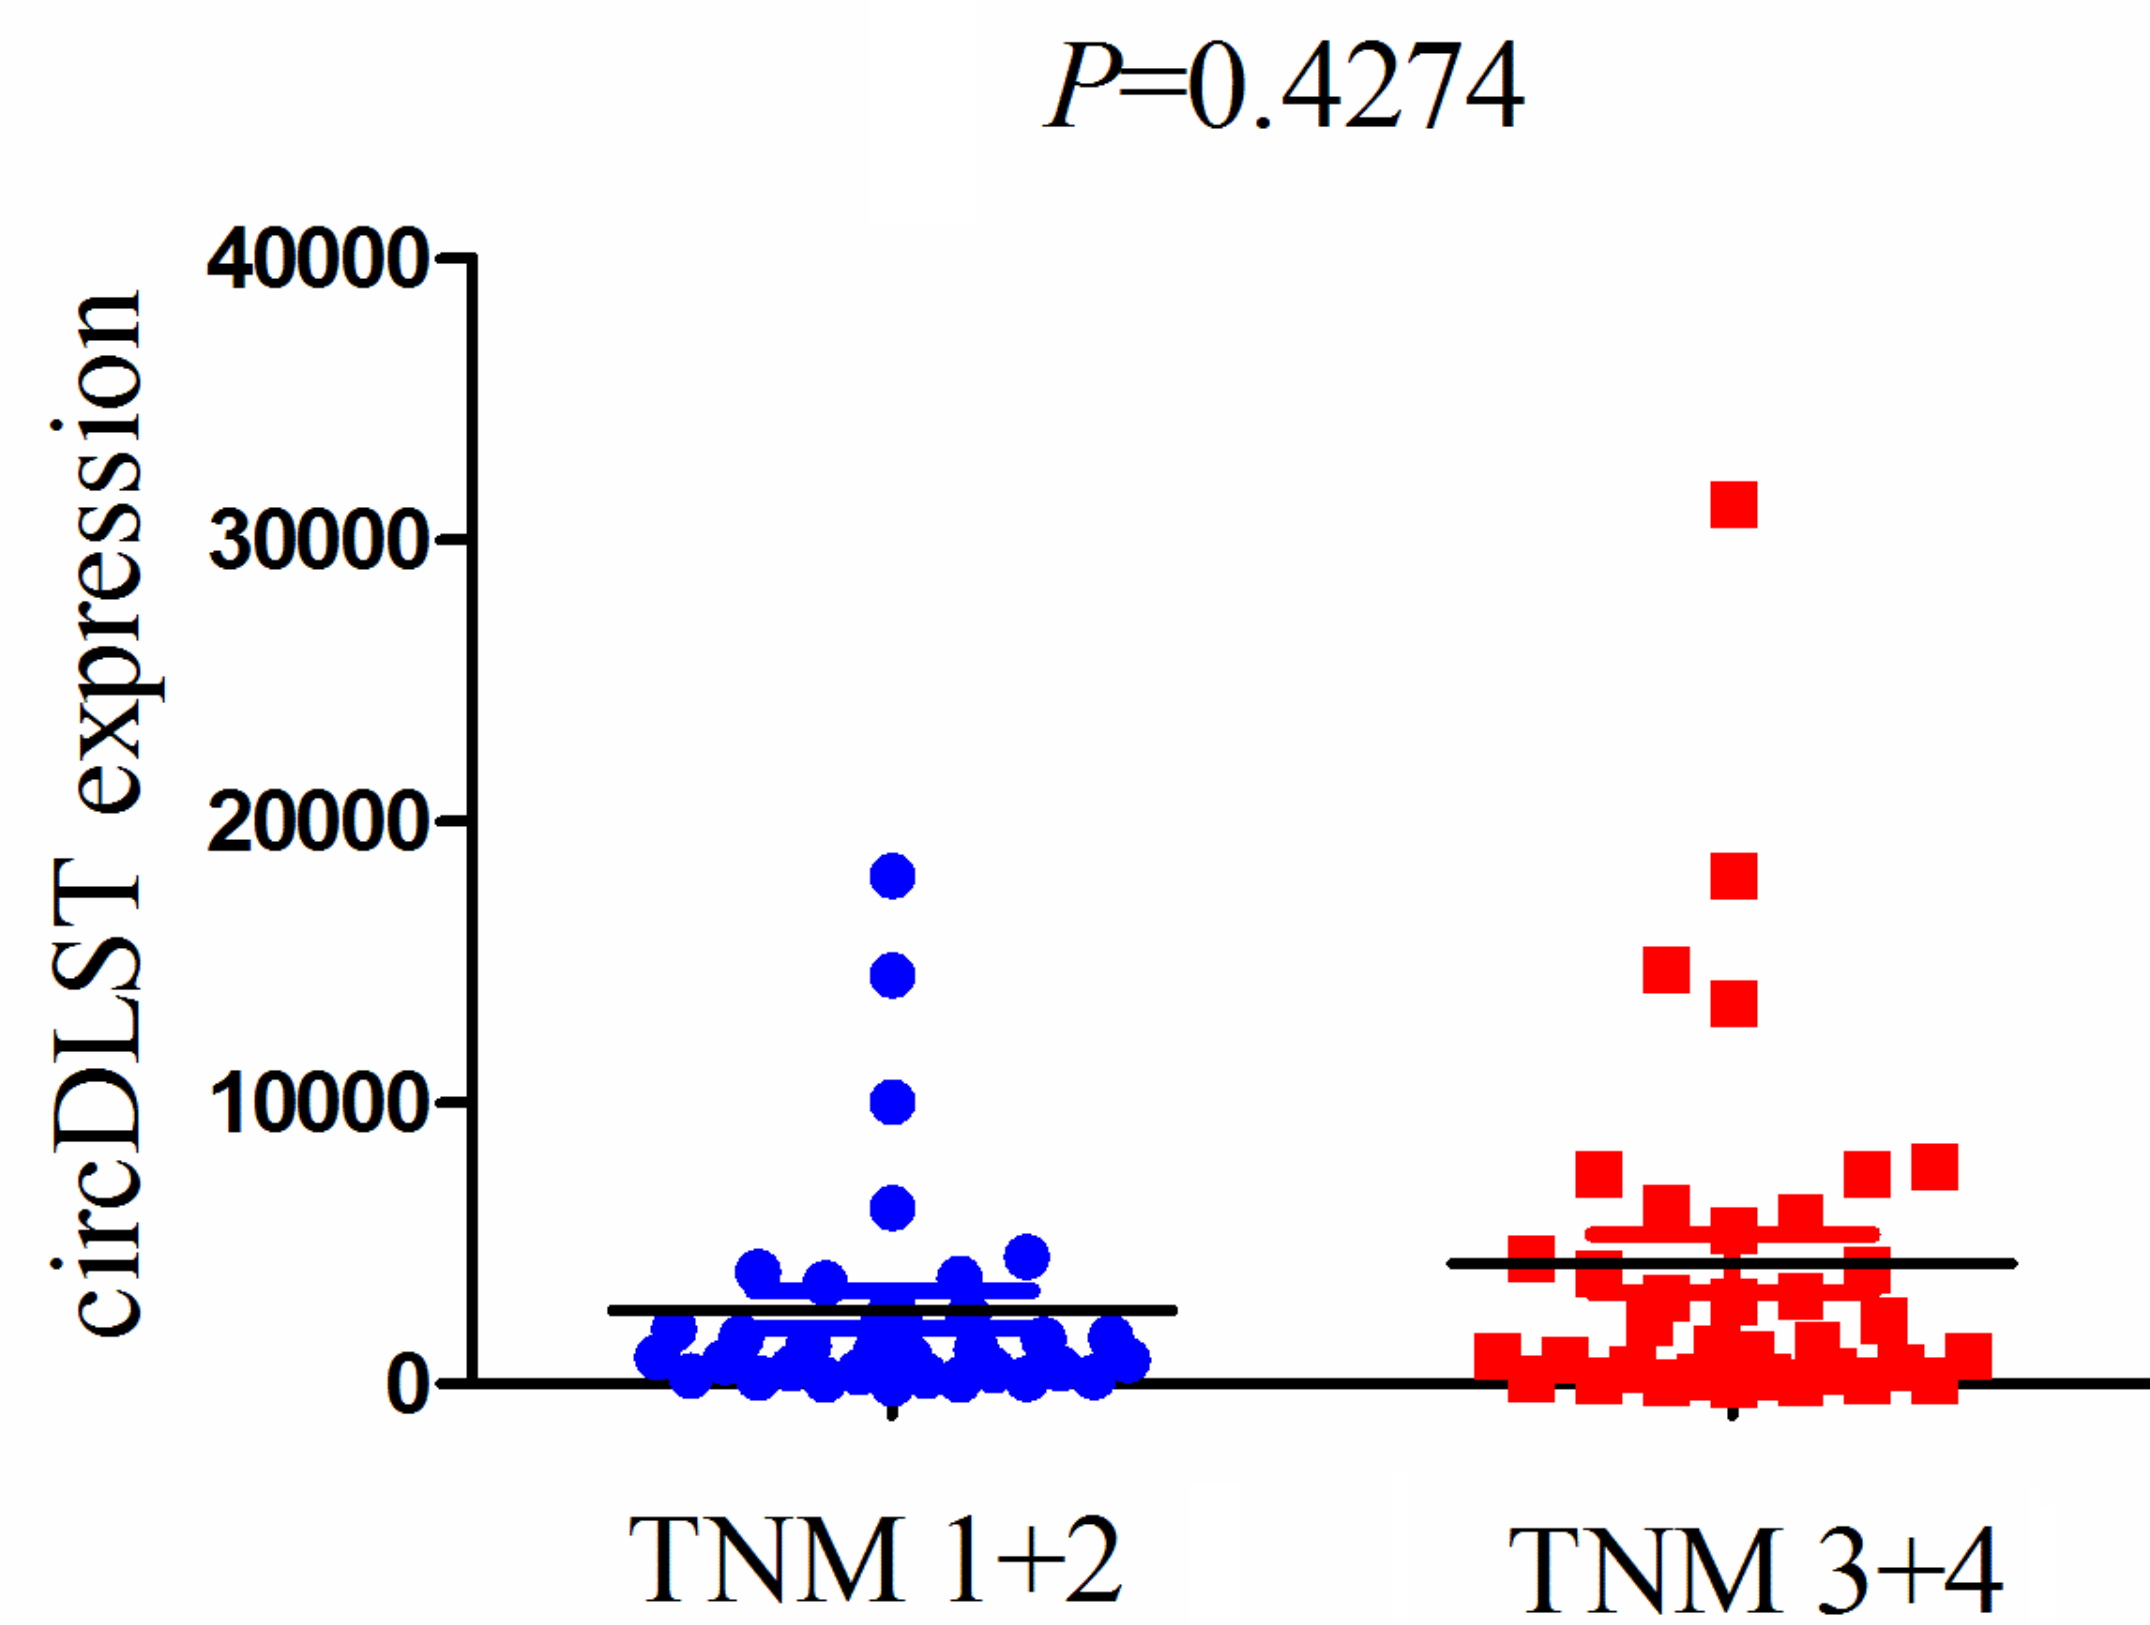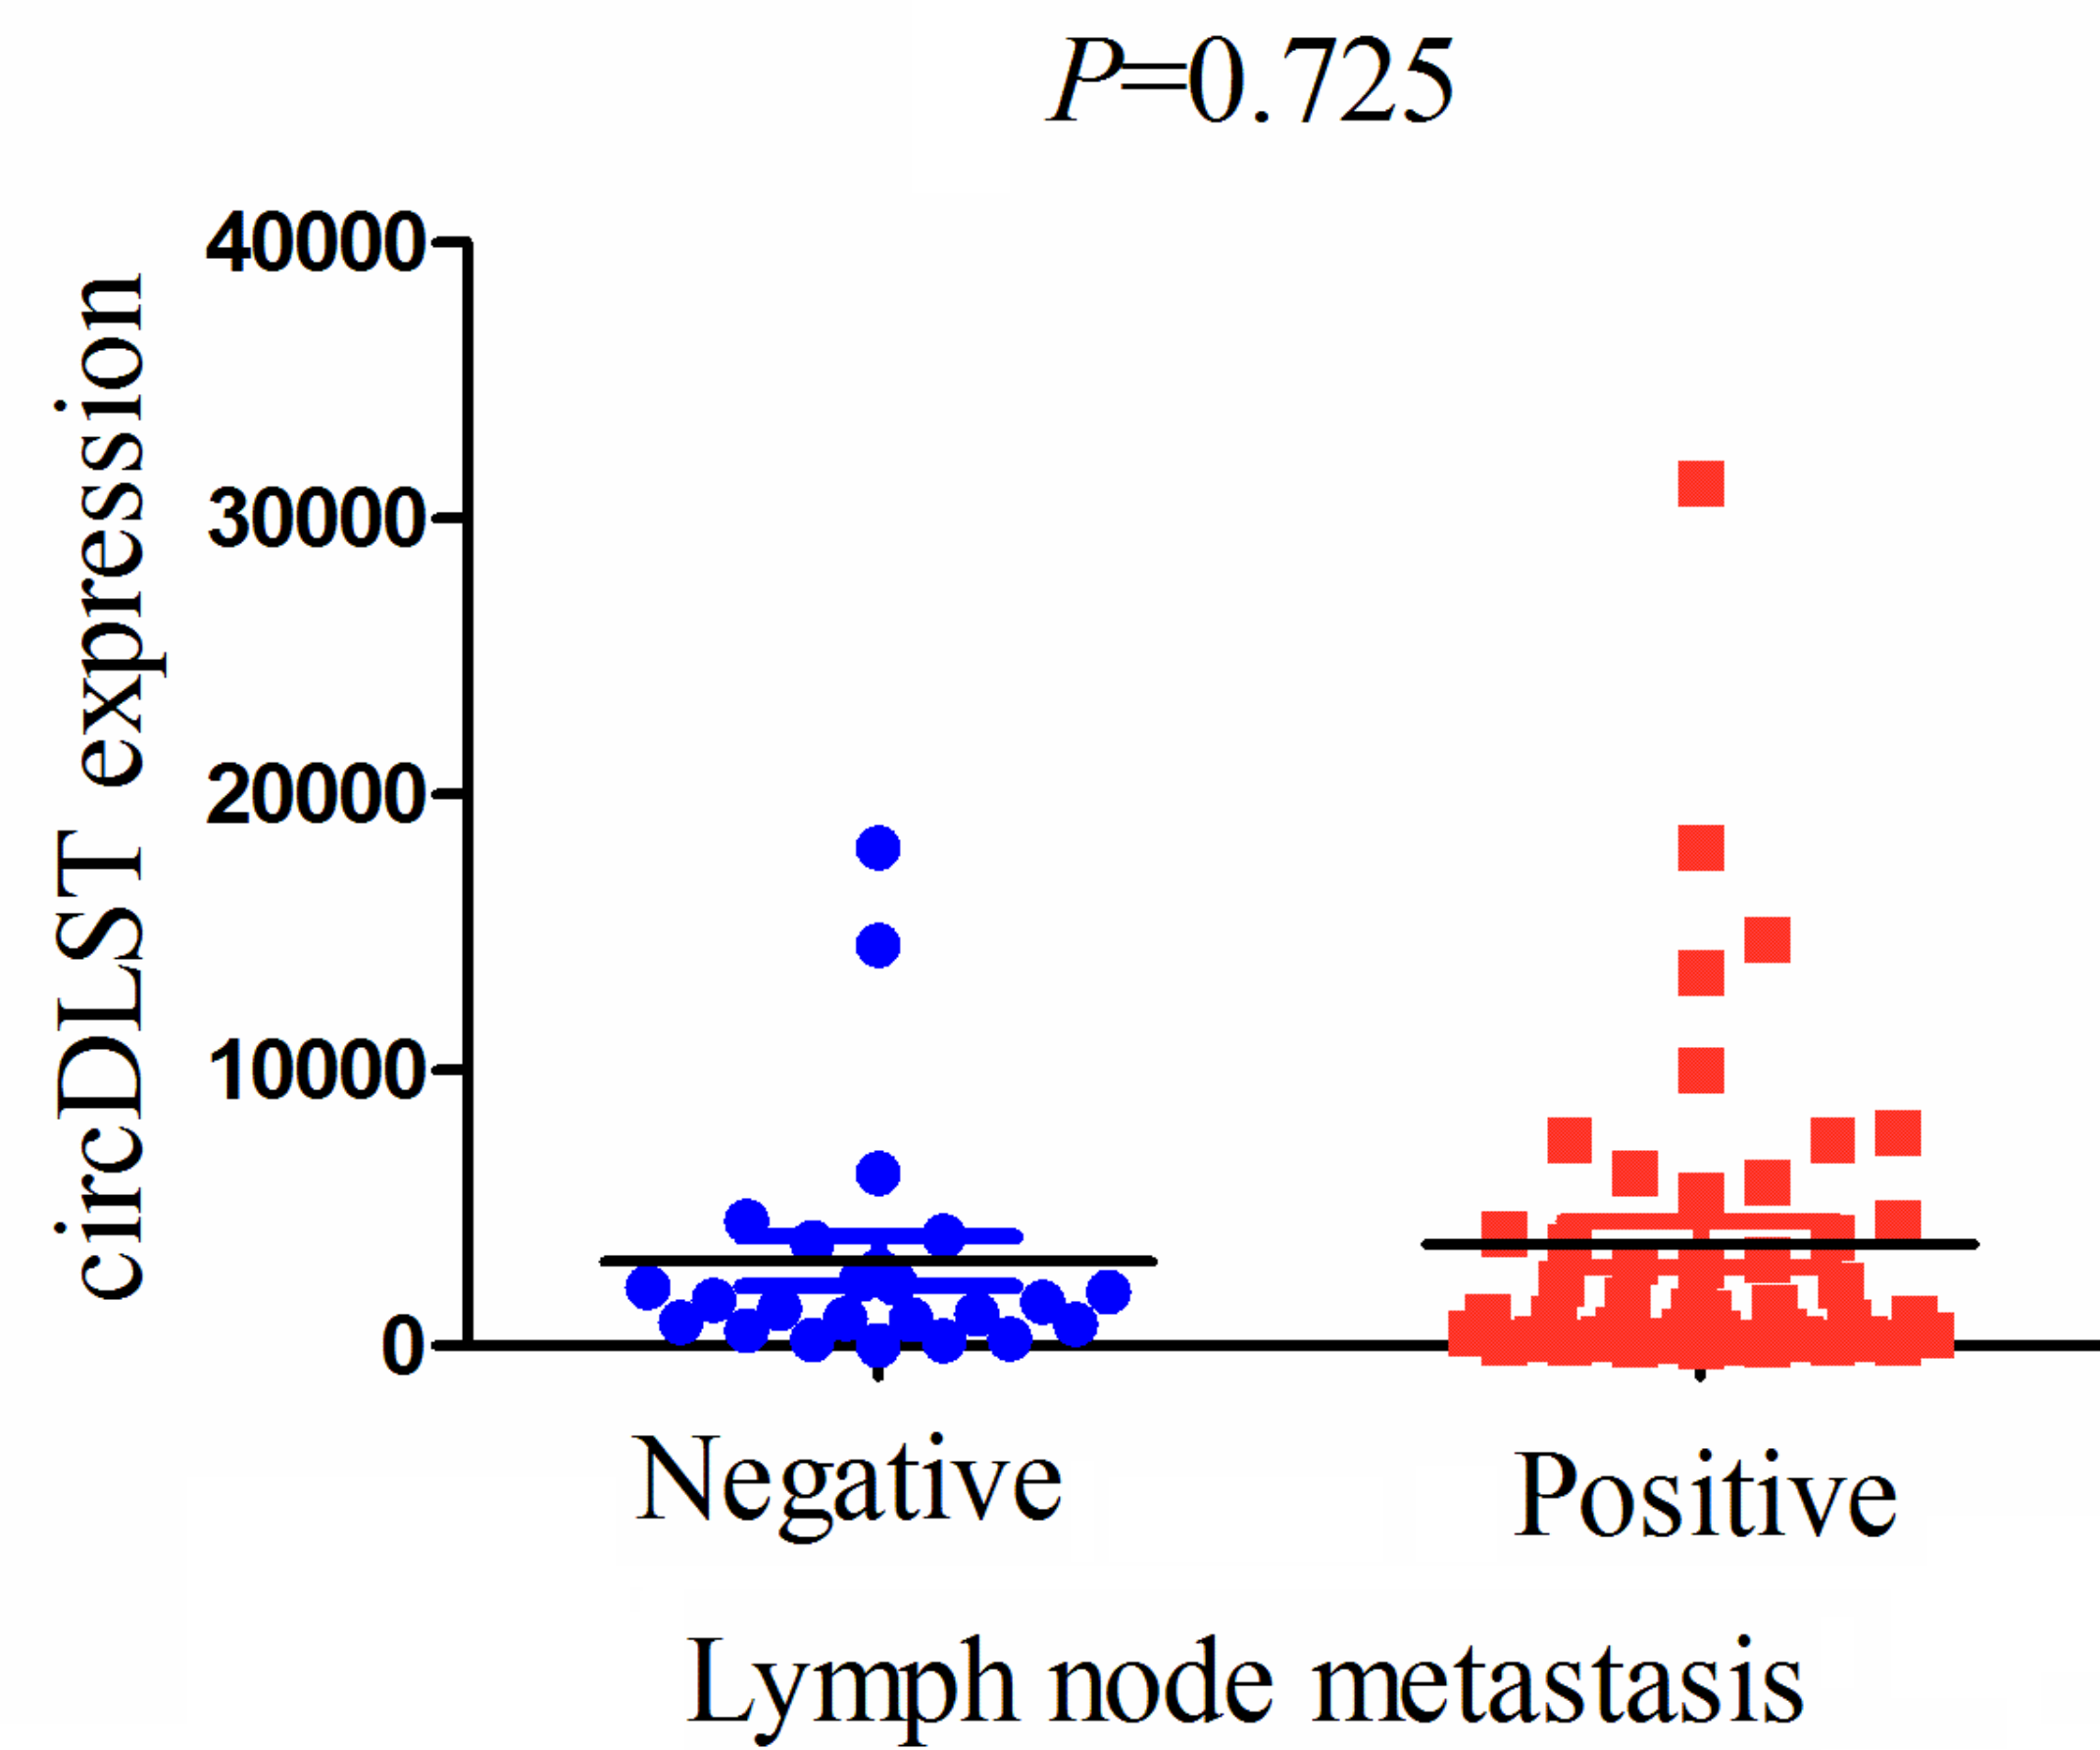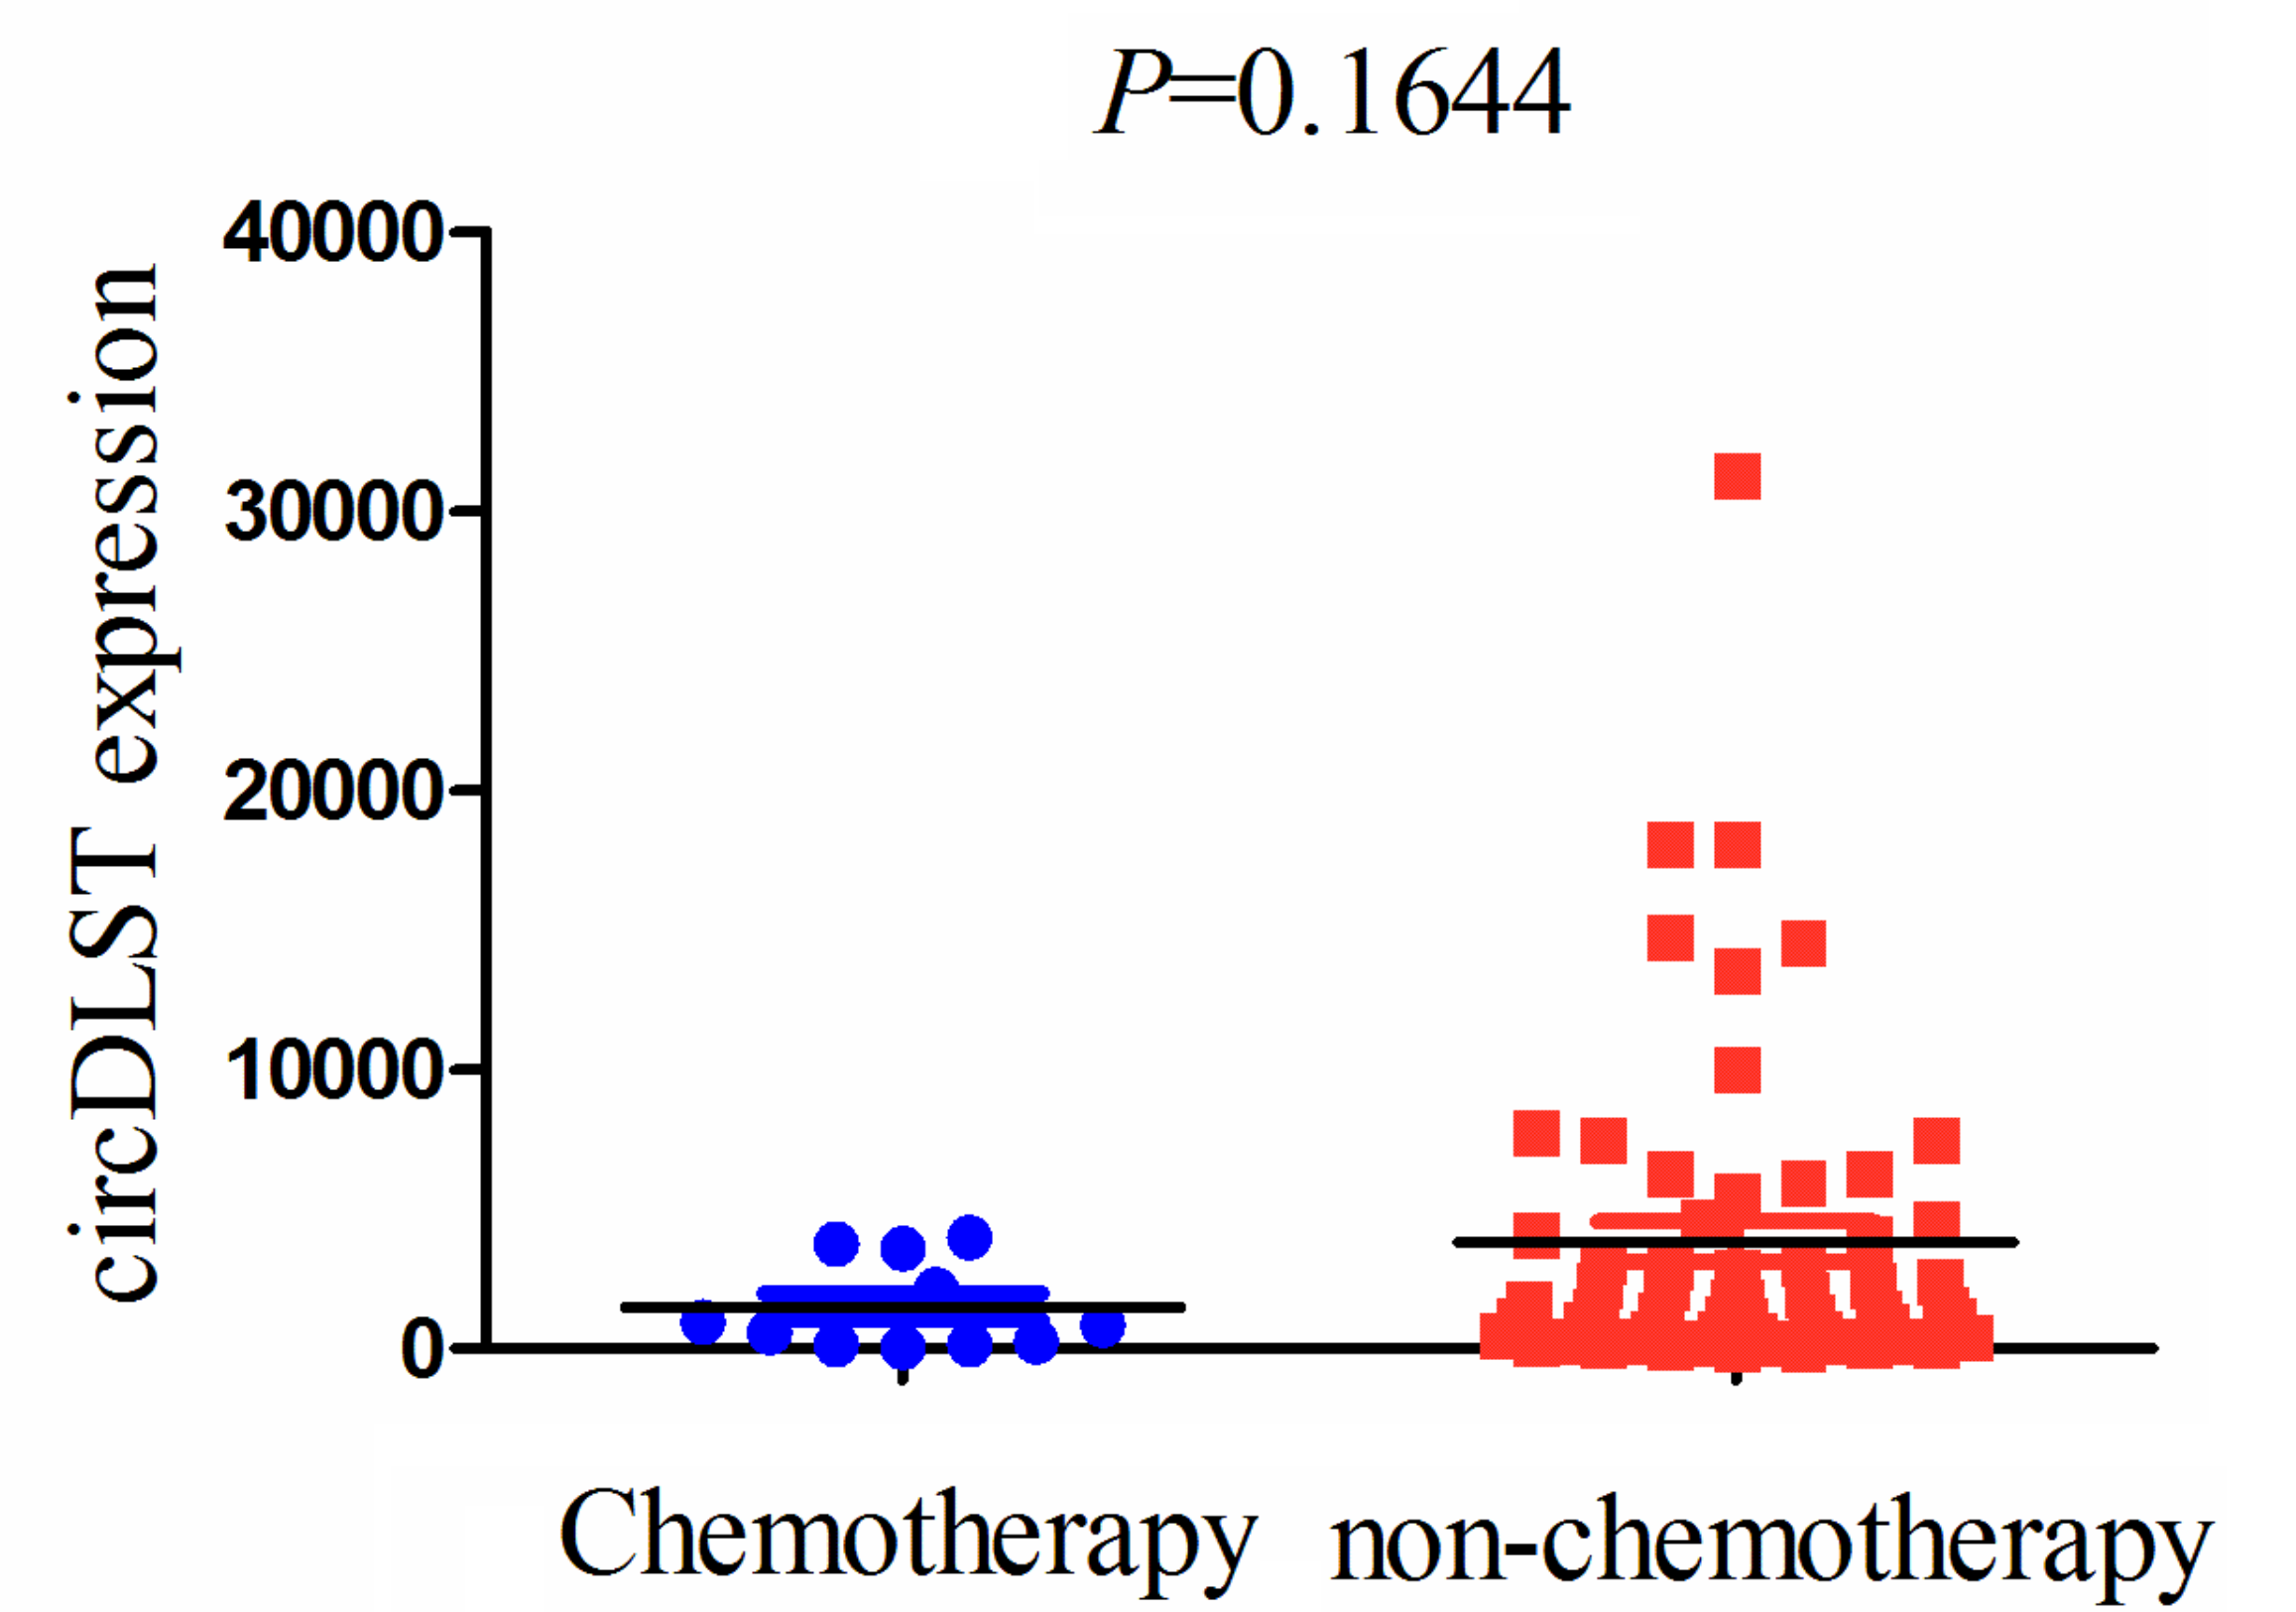

Supplement: 12943_2019_1015_MOESM3_ESM.pdf [file 12943_2019_1015_MOESM3_ESM.pdf]
